# Supplementary material for: Downregulated ADAMTS1 Incorporating A2M Contributes to Tumorigenesis and Alters Tumor Immune Microenvironment in Lung Adenocarcinoma
Source: MDPI journal article supplement (doi:10.3390/biology11050760), 2022-05-16

E-cadherin  
BD (610182) 120 kDa

180 kDa  
130 kDa

95 kDa

72 kDa

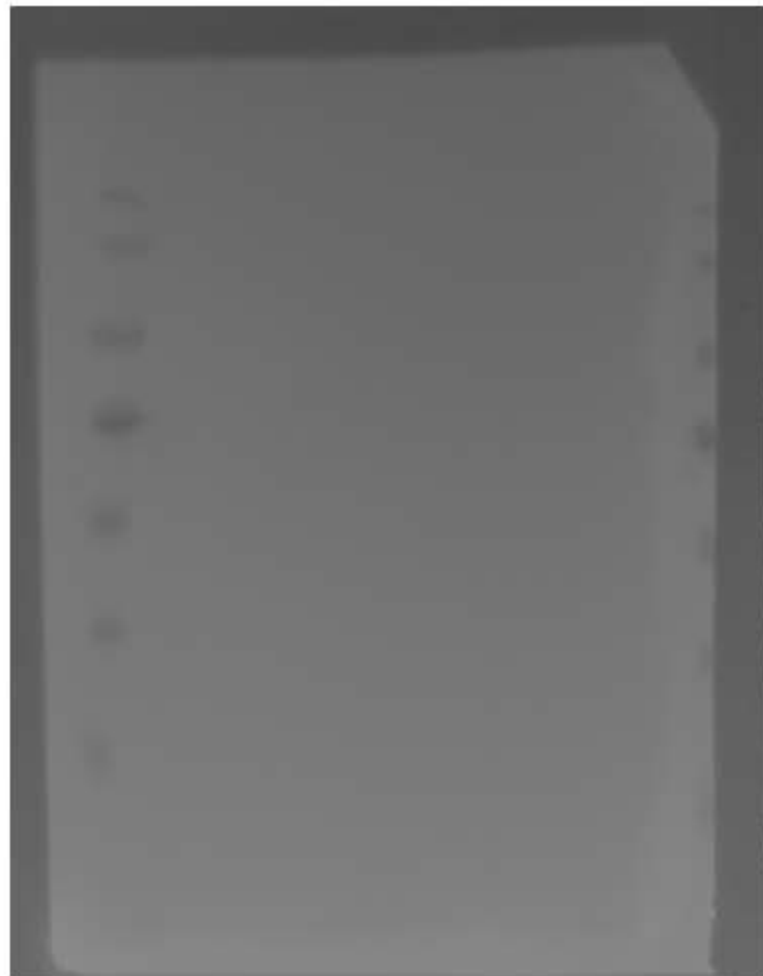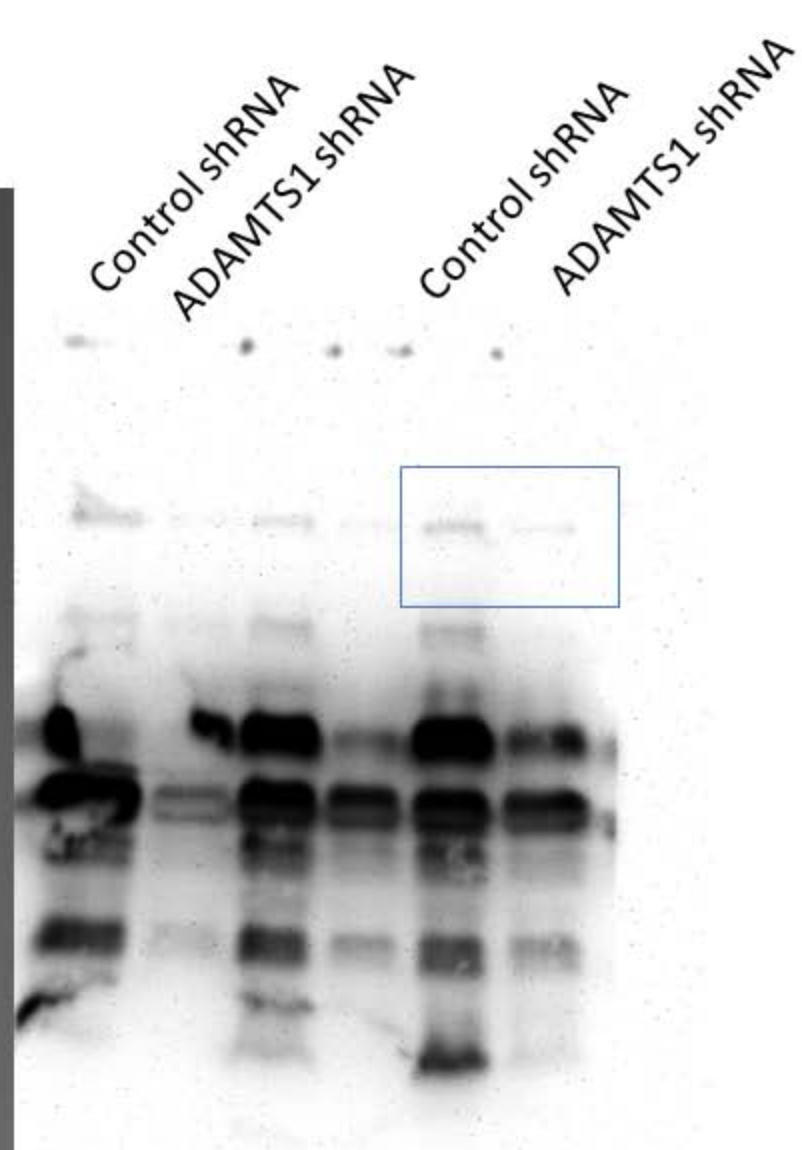

N-cadherin  
BD (610921)  
130 kDa

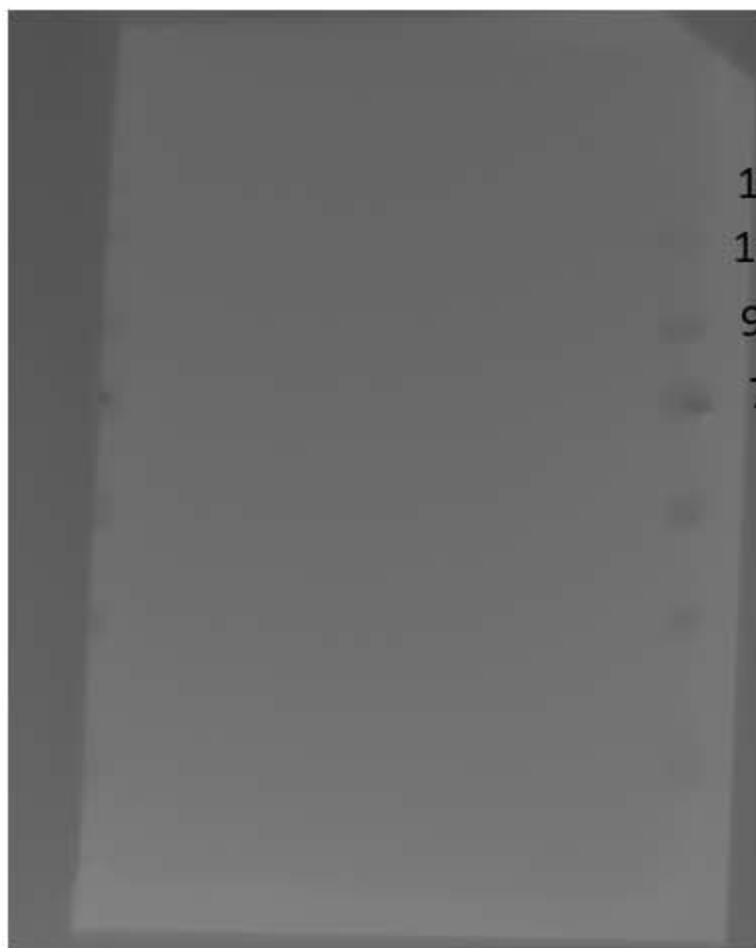

180 kDa  
130 kDa  
95 kDa  
72 kDa

Control shRNA  
ADAMTS1 shRNA

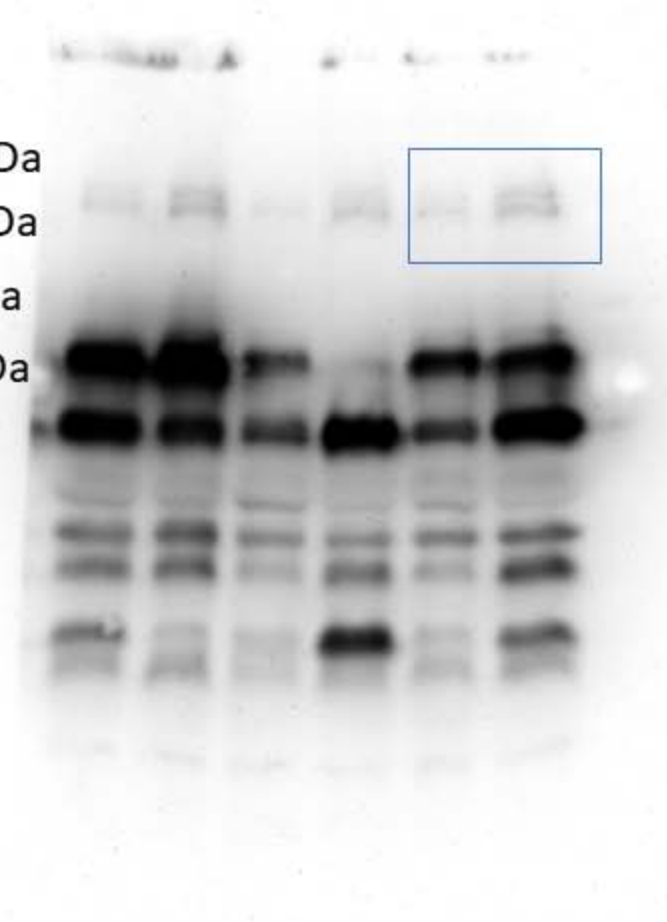

$\alpha$ -SMA  
Sigma (A5228)  
42 kDa

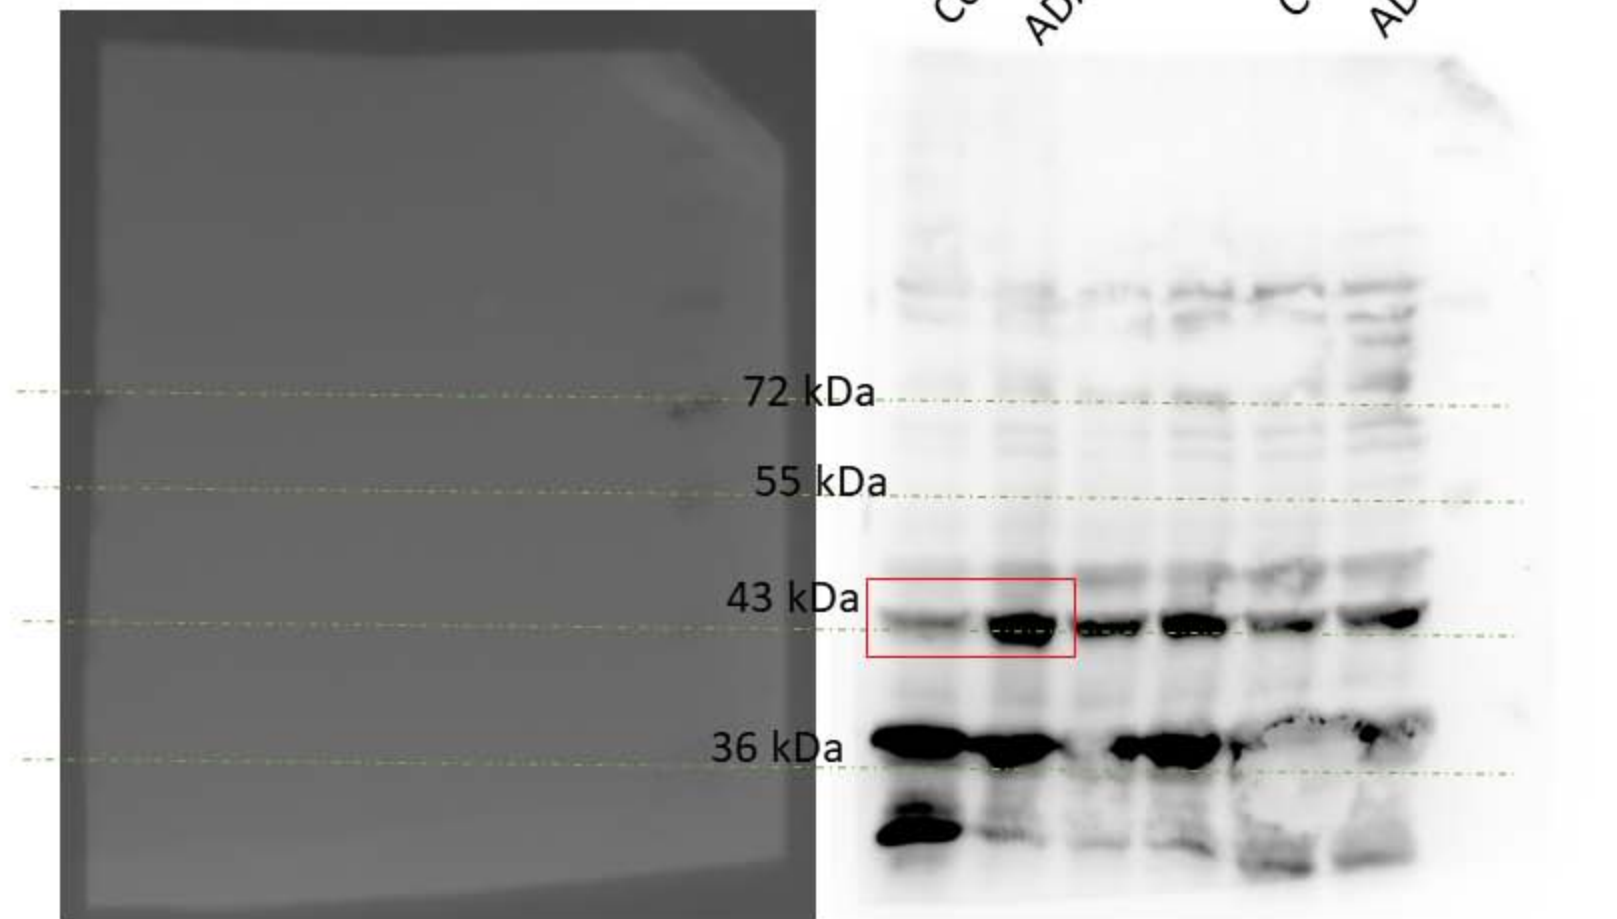

Vimentin  
BD (550513)  
57 kDa

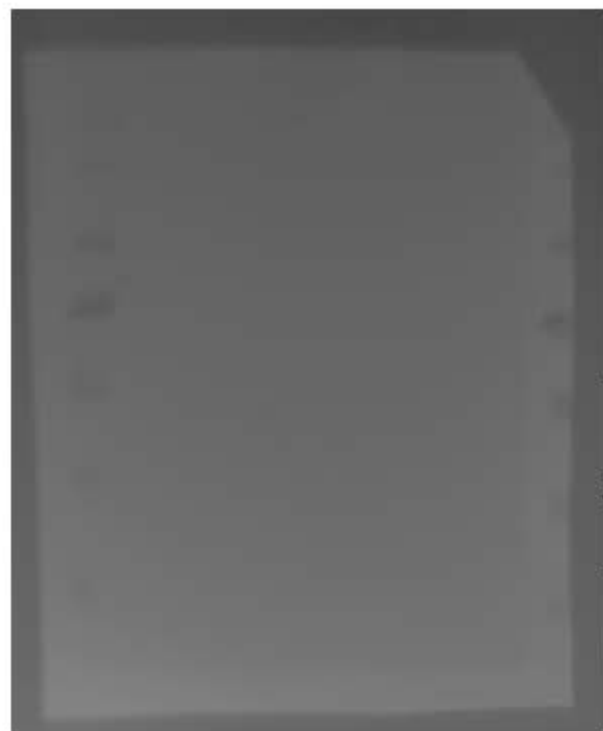

72 kDa  
55 kDa  
43 kDa

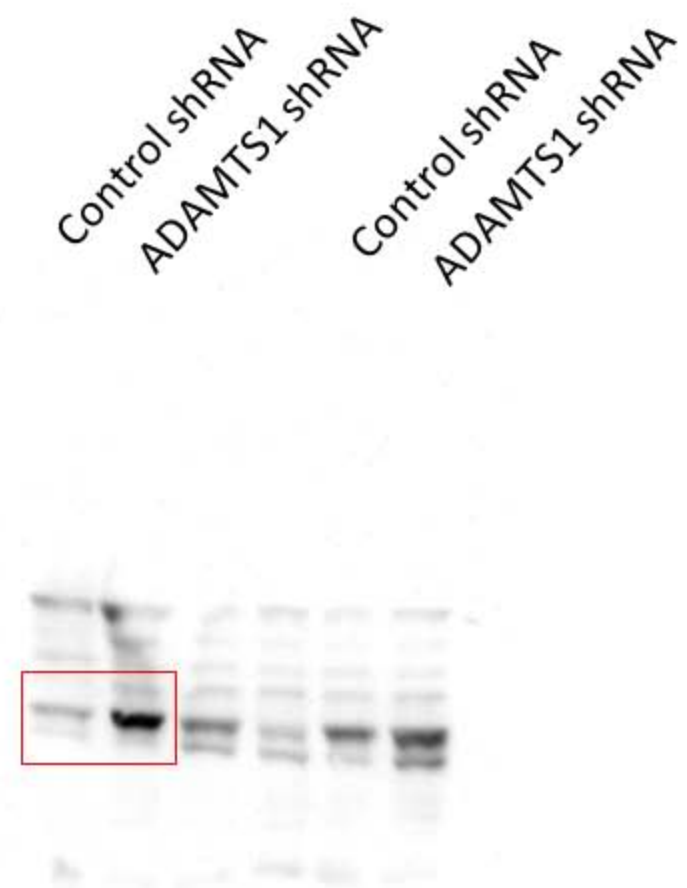

2021.09.25

Snail

Cell Signaling (3879s)

29 kDa

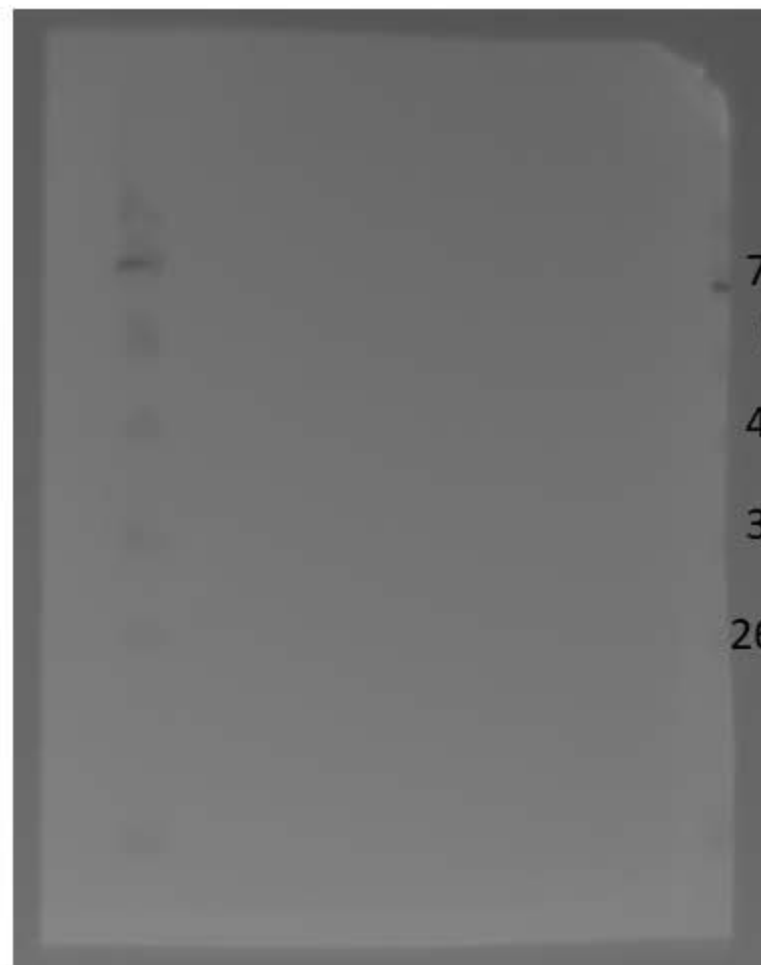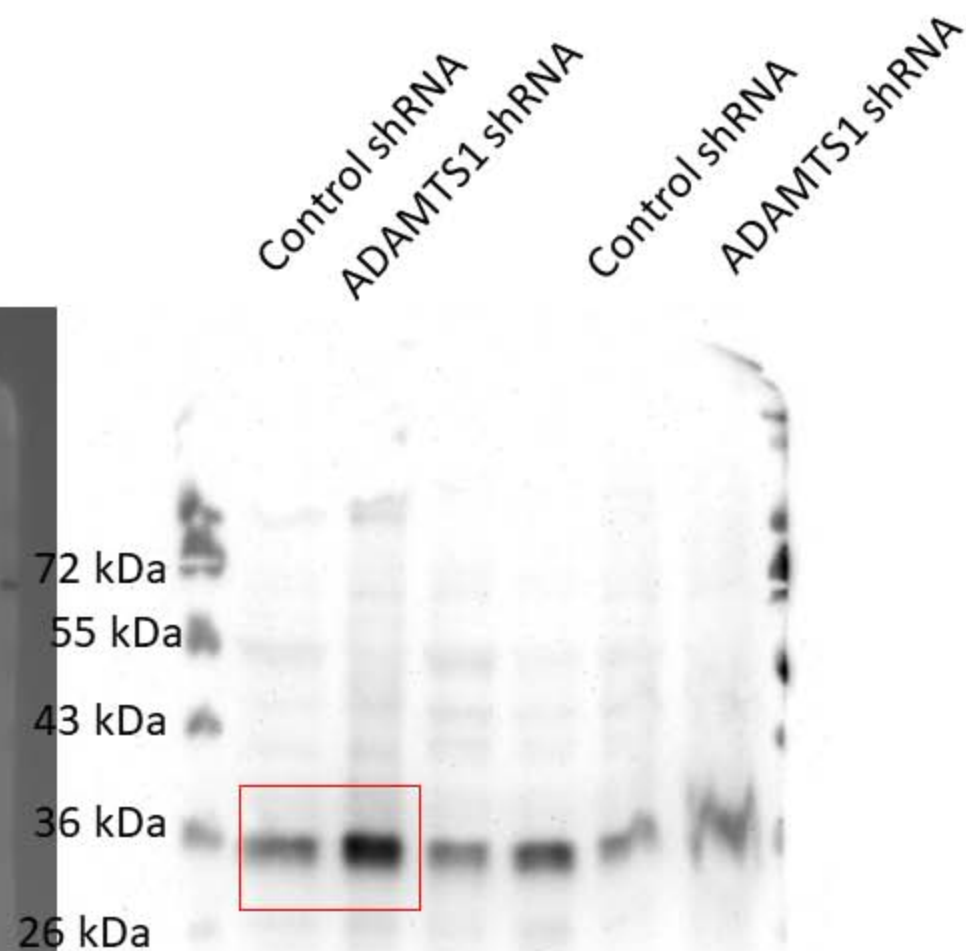

Slug  
Cell Signaling (9585s)  
30 kDa

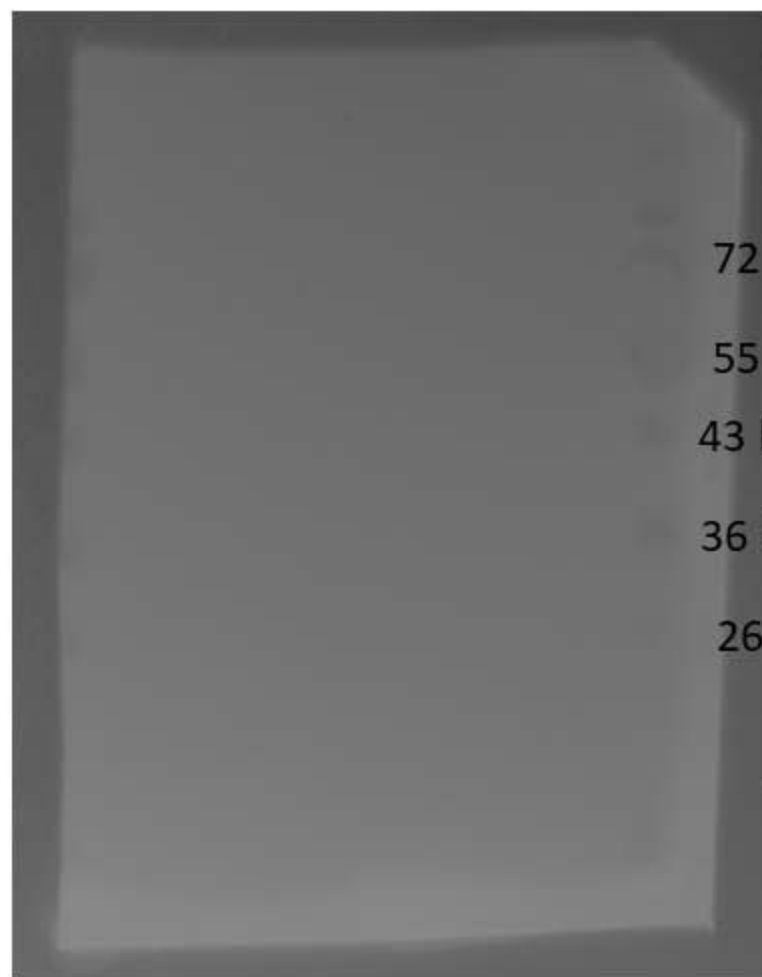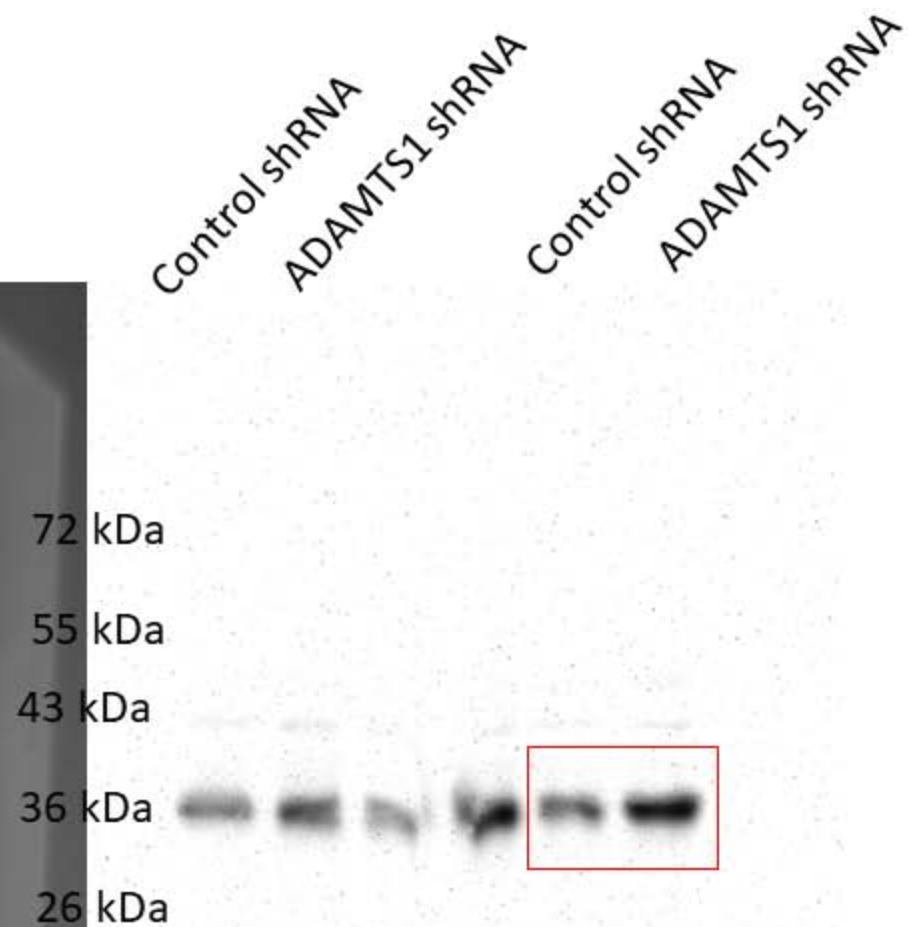

GAPDH  
Millipore (MAB374)  
38 kDa

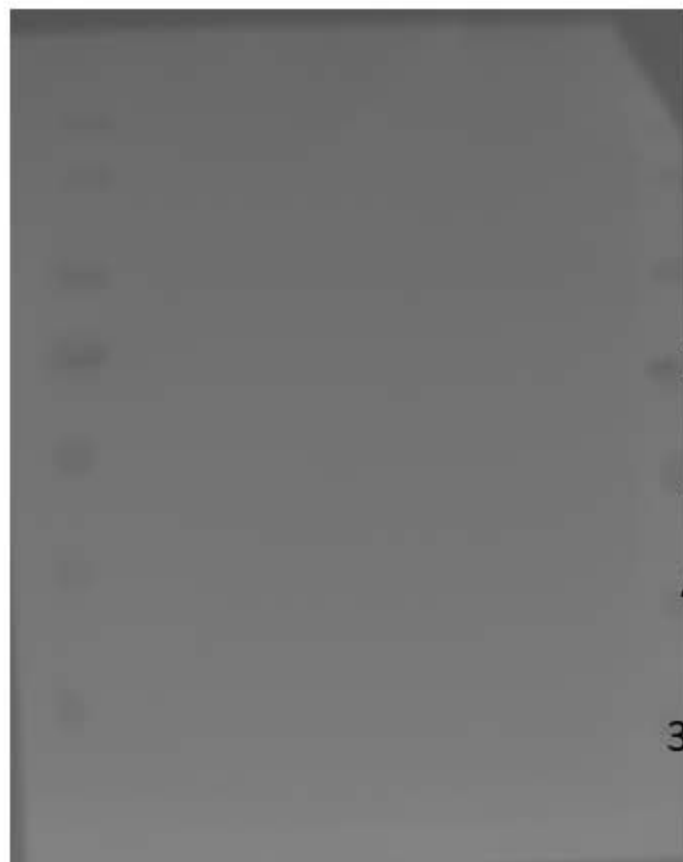

72 kDa  
55 kDa  
43 kDa  
36 kDa

Control shRNA  
ADAMTS1 shRNA

Control shRNA  
ADAMTS1 shRNA

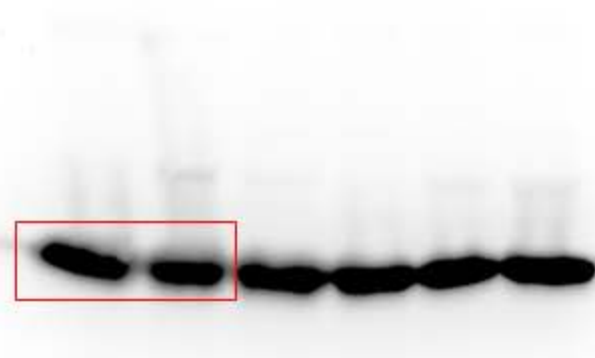

Supplement: s1 [file s1]
